# Supplementary material
Source: publisher site journal article supplement (https://www.dovepress.com/article/181242)
Supplement: Supplementary file 1 [file get_supplementary_file.php]

**Table S1. Definitions of diseases of interest, in CPRD.**

Patients were determined to have a diagnosis for the respective disease if they had a Clinical or Referral event with at least one of the diagnosis codes indicated below.

| Condition                             | Diagnosis Codes (READ Codes)                                                                                                                                                                                                                                                                                                                                                                                                                                                                                                                                                                                                                                                                                                                                                                                                                                                                   |
|---------------------------------------|------------------------------------------------------------------------------------------------------------------------------------------------------------------------------------------------------------------------------------------------------------------------------------------------------------------------------------------------------------------------------------------------------------------------------------------------------------------------------------------------------------------------------------------------------------------------------------------------------------------------------------------------------------------------------------------------------------------------------------------------------------------------------------------------------------------------------------------------------------------------------------------------|
| Chronic Obstructive Pulmonary Disease | H3...00, H3...11, H31..00, H310.00, H310000, H310z00, H311.00, H311000, H311100, H311z00, H312.00, H312000, H312011, H312100, H312300, H312z00, H313.00, H31y.00, H31y100, H31yz00, H31z.00, H32..00, H320.00, H320000, H320100, H320200, H320300, H320311, H320z00, H321.00, H322.00, H32y.00, H32y000, H32y100, H32y111, H32y200, H32yz00, H32z.00, H36..00, H37..00, H38..00, H39..00, H3A..00, H3B..00, H3y..00, H3y..11, H464000, H464100, H583200, Hyu3000, Hyu3100                                                                                                                                                                                                                                                                                                                                                                                                                      |
| Cystic Fibrosis                       | C10N100, C370.00, C370.12, C370000, C370100, C370111, C370200, C370300, C370400, C370500, C370700, C370800, C370900, C370y00, C370z00                                                                                                                                                                                                                                                                                                                                                                                                                                                                                                                                                                                                                                                                                                                                                          |
| Inflammatory Bowel Disease            | 14C4.11, 8Cc5.00, 8Cc5.11, J08z900, J40..00, J40..11, J40..12, J400.00, J400000, J400100, J400200, J400300, J400400, J400500, J400z00, J401.00, J401000, J401100, J401200, J401z00, J401z11, J402.00, J40z.00, J40z.11, J41..00, J41..11, J41..12, J410.00, J410000, J410100, J410200, J410300, J410400, J410z00, J411.00, J412.00, J41y.00, J41yz00, J41z.00, J574C00, Jyu4.00, Jyu4000, Jyu4100, N031000, N031100, N045300, N045400, ZR3S.00, ZR3S.11, J4...00, J4...12                                                                                                                                                                                                                                                                                                                                                                                                                      |
| Psoriasis                             | M16..00, M161.00, M161000, M161100, M161200, M161300, M161400, M161500, M161600, M161700, M161800, M161900, M161A00, M161B00, M161C00, M161E00, M161F00, M161F11, M161H00, M161z00, M16y.00, M16y000, M16z.00, Myu3000, M160000, M161D00, M161J00, M166.00                                                                                                                                                                                                                                                                                                                                                                                                                                                                                                                                                                                                                                     |
| Schizophrenia                         | 1464.00, 212T.00, E10..00, E100.00, E100.11, E100000, E100100, E100200, E100300, E100400, E100500, E100z00, E101.00, E101000, E101400, E101500, E101z00, E102.00, E102000, E102100, E102400, E102500, E102z00, E103.00, E103000, E103100, E103200, E103300, E103400, E103500, E103z00, E104.00, E105.00, E105000, E105200, E105500, E105z00, E106.00, E107.00, E107.11, E107000, E107100, E107200, E107300, E107400, E107500, E107z00, E10y.00, E10y.11, E10y000, E10y100, E10yz00, E10z.00, E14z.11, Eu05200, Eu05212, Eu2..00, Eu20.00, Eu20000, Eu20011, Eu20100, Eu20111, Eu20200, Eu20212, Eu20213, Eu20214, Eu20300, Eu20311, Eu20400, Eu20500, Eu20511, Eu20600, Eu20y00, Eu20z00, Eu21.11, Eu21.12, Eu21.13, Eu21.14, Eu21.15, Eu21.16, Eu21.17, Eu23112, Eu23200, Eu23214, Eu25.00, Eu25000, Eu25011, Eu25100, Eu25111, Eu25200, Eu25211, Eu25212, Eu25y00, Eu25z00, Eu25z11, ZV11000 |

**Table S2. Disease diagnosis definition, in MarketScan.**

Patients were determined to have a diagnosis for the respective disease if they had an Inpatient, Inpatient Service, or Outpatient event with at least one of the diagnosis codes indicated below.

| Condition                             | Diagnosis Codes (ICD-9 Diagnosis Codes)                                                                                                                                                                                                                                                                                                                                                                                                                                                                                                                                   |
|---------------------------------------|---------------------------------------------------------------------------------------------------------------------------------------------------------------------------------------------------------------------------------------------------------------------------------------------------------------------------------------------------------------------------------------------------------------------------------------------------------------------------------------------------------------------------------------------------------------------------|
| Chronic Obstructive Pulmonary Disease | 491, 491.0, 491.1, 491.2, 491.20, 491.21, 491.22, 491.8, 491.9, 492, 492.0, 492.8, 496                                                                                                                                                                                                                                                                                                                                                                                                                                                                                    |
| Cystic Fibrosis                       | 277.0, 277.00, 277.01, 277.02, 277.03, 277.09                                                                                                                                                                                                                                                                                                                                                                                                                                                                                                                             |
| Inflammatory Bowel Disease            | 555, 555.0, 555.1, 555.2, 555.9, 556, 556.0, 556.1, 556.2, 556.3, 556.4, 556.5, 556.6, 556.8, 556.9                                                                                                                                                                                                                                                                                                                                                                                                                                                                       |
| Psoriasis                             | 696, 696.1, 696.8                                                                                                                                                                                                                                                                                                                                                                                                                                                                                                                                                         |
| Schizophrenia                         | 295, 295.0, 295.00, 295.01, 295.02, 295.03, 295.04, 295.05, 295.1, 295.10, 295.11, 295.12, 295.13, 295.14, 295.15, 295.2, 295.20, 295.21, 295.22, 295.23, 295.24, 295.25, 295.3, 295.30, 295.31, 295.32, 295.33, 295.34, 295.35, 295.4, 295.40, 295.41, 295.42, 295.43, 295.44, 295.45, 295.5, 295.50, 295.51, 295.52, 295.53, 295.54, 295.55, 295.6, 295.60, 295.61, 295.62, 295.63, 295.64, 295.65, 295.7, 295.70, 295.71, 295.72, 295.73, 295.74, 295.75, 295.8, 295.80, 295.81, 295.82, 295.83, 295.84, 295.85, 295.9, 295.90, 295.91, 295.92, 295.93, 295.94, 295.95 |

**Table S3. Median length of observable look-back time available, in years.**

| Database   | 2011 | 2012 | 2013 | 2014 |
|------------|------|------|------|------|
| CPRD       | 8.22 | 8.61 | 9.13 | 9.74 |
| MarketScan | 2.00 | 2.00 | 2.25 | 2.75 |

Table S4. Prevalence and incidence estimates, from CPRD.

| Disease         | Parameter  | Case | Estimate (95% Confidence Interval) |                               |                               |                               |
|-----------------|------------|------|------------------------------------|-------------------------------|-------------------------------|-------------------------------|
|                 |            |      | 2011                               | 2012                          | 2013                          | 2014                          |
| COPD            | Incidence  | 1    | 0.370 (0.364, 0.375)               | 0.352 (0.346, 0.357)          | 0.325 (0.320, 0.330)          | 0.298 (0.293, 0.304)          |
| COPD            | Incidence  | 2    | 0.295 (0.290, 0.300)               | 0.270 (0.265, 0.274)          | 0.250 (0.245, 0.254)          | 0.234 (0.229, 0.238)          |
| COPD            | Incidence  | 3    | 0.176 (0.173, 0.180)               | 0.174 (0.170, 0.177)          | 0.167 (0.163, 0.171)          | 0.158 (0.154, 0.161)          |
| COPD            | Incidence  | 4    | 0.184 (0.180, 0.188)               | 0.180 (0.176, 0.184)          | 0.178 (0.174, 0.183)          | 0.174 (0.169, 0.178)          |
| COPD            | Prevalence | 1    | 0.406 (0.400, 0.412)               | 0.434 (0.428, 0.440)          | 0.405 (0.399, 0.411)          | 0.388 (0.382, 0.394)          |
| COPD            | Prevalence | 2    | 0.658 (0.650, 0.665)               | 0.701 (0.693, 0.708)          | 0.693 (0.686, 0.701)          | 0.653 (0.645, 0.660)          |
| COPD            | Prevalence | 3    | 1.560 (1.549, 1.572)               | 1.610 (1.599, 1.622)          | 1.653 (1.642, 1.665)          | 1.683 (1.671, 1.695)          |
| COPD            | Prevalence | 4    | 1.511 (1.500, 1.523)               | 1.563 (1.552, 1.575)          | 1.591 (1.579, 1.604)          | 1.627 (1.614, 1.641)          |
| Psoriasis       | Incidence  | 1    | 0.349 (0.343, 0.354)               | 0.345 (0.340, 0.350)          | 0.328 (0.323, 0.334)          | 0.306 (0.301, 0.311)          |
| Psoriasis       | Incidence  | 2    | 0.288 (0.283, 0.293)               | 0.284 (0.279, 0.289)          | 0.270 (0.265, 0.275)          | 0.252 (0.247, 0.257)          |
| Psoriasis       | Incidence  | 3    | 0.154 (0.151, 0.158)               | 0.147 (0.143, 0.150)          | 0.143 (0.139, 0.146)          | 0.133 (0.129, 0.136)          |
| Psoriasis       | Incidence  | 4    | 0.164 (0.160, 0.168)               | 0.155 (0.151, 0.159)          | 0.155 (0.151, 0.159)          | 0.149 (0.145, 0.153)          |
| Psoriasis       | Prevalence | 1    | 0.440 (0.434, 0.446)               | 0.450 (0.444, 0.456)          | 0.443 (0.437, 0.449)          | 0.434 (0.428, 0.440)          |
| Psoriasis       | Prevalence | 2    | 0.770 (0.762, 0.778)               | 0.761 (0.753, 0.768)          | 0.764 (0.756, 0.772)          | 0.756 (0.747, 0.764)          |
| Psoriasis       | Prevalence | 3    | 2.972 (2.956, 2.987)               | 3.046 (3.030, 3.061)          | 3.101 (3.086, 3.117)          | 3.180 (3.164, 3.197)          |
| Psoriasis       | Prevalence | 4    | 3.004 (2.988, 3.020)               | 3.078 (3.062, 3.094)          | 3.157 (3.140, 3.174)          | 3.228 (3.209, 3.246)          |
| IBD             | Incidence  | 1    | 0.0907 (0.0880, 0.0934)            | 0.0956 (0.0929, 0.0985)       | 0.0891 (0.0864, 0.0918)       | 0.0879 (0.0851, 0.0907)       |
| IBD             | Incidence  | 2    | 0.0742 (0.0718, 0.0766)            | 0.0801 (0.0776, 0.0827)       | 0.0735 (0.0711, 0.0760)       | 0.0735 (0.0710, 0.0761)       |
| IBD             | Incidence  | 3    | 0.0383 (0.0366, 0.0401)            | 0.0412 (0.0394, 0.0431)       | 0.0376 (0.0358, 0.0394)       | 0.0390 (0.0372, 0.0410)       |
| IBD             | Incidence  | 4    | 0.0403 (0.0385, 0.0423)            | 0.0431 (0.0412, 0.0452)       | 0.0400 (0.0381, 0.0421)       | 0.0436 (0.0415, 0.0459)       |
| IBD             | Prevalence | 1    | 0.123 (0.120, 0.126)               | 0.121 (0.118, 0.125)          | 0.126 (0.123, 0.129)          | 0.123 (0.120, 0.126)          |
| IBD             | Prevalence | 2    | 0.212 (0.208, 0.216)               | 0.208 (0.204, 0.212)          | 0.212 (0.207, 0.216)          | 0.212 (0.207, 0.216)          |
| IBD             | Prevalence | 3    | 0.866 (0.858, 0.874)               | 0.885 (0.876, 0.893)          | 0.903 (0.895, 0.912)          | 0.923 (0.914, 0.932)          |
| IBD             | Prevalence | 4    | 0.879 (0.870, 0.888)               | 0.894 (0.885, 0.903)          | 0.920 (0.911, 0.930)          | 0.938 (0.928, 0.948)          |
| Schizophrenia   | Incidence  | 1    | 0.0283 (0.0268, 0.0299)            | 0.0291 (0.0276, 0.0306)       | 0.0315 (0.0300, 0.0332)       | 0.0292 (0.0276, 0.0308)       |
| Schizophrenia   | Incidence  | 2    | 0.0253 (0.0239, 0.0268)            | 0.0258 (0.0243, 0.0272)       | 0.0278 (0.0263, 0.0294)       | 0.0259 (0.0244, 0.0275)       |
| Schizophrenia   | Incidence  | 3    | 0.0108 (0.0099, 0.0118)            | 0.0106 (0.0097, 0.0116)       | 0.0112 (0.0103, 0.0122)       | 0.0112 (0.0102, 0.0122)       |
| Schizophrenia   | Incidence  | 4    | 0.0111 (0.0101, 0.0121)            | 0.0109 (0.0099, 0.0119)       | 0.0114 (0.0104, 0.0125)       | 0.0120 (0.0109, 0.0132)       |
| Schizophrenia   | Prevalence | 1    | 0.0352 (0.0336, 0.0370)            | 0.0400 (0.0383, 0.0419)       | 0.0399 (0.0381, 0.0418)       | 0.0446 (0.0427, 0.0467)       |
| Schizophrenia   | Prevalence | 2    | 0.0630 (0.0608, 0.0653)            | 0.0663 (0.0640, 0.0686)       | 0.0704 (0.0680, 0.0728)       | 0.0755 (0.0730, 0.0782)       |
| Schizophrenia   | Prevalence | 3    | 0.362 (0.356, 0.367)               | 0.365 (0.360, 0.371)          | 0.366 (0.360, 0.371)          | 0.368 (0.362, 0.374)          |
| Schizophrenia   | Prevalence | 4    | 0.352 (0.347, 0.358)               | 0.354 (0.348, 0.360)          | 0.351 (0.345, 0.356)          | 0.351 (0.345, 0.357)          |
| Cystic Fibrosis | Incidence  | 1    | 0.00173 (0.00139, 0.00214)         | 0.00177 (0.00142, 0.00219)    | 0.00147 (0.00116, 0.00187)    | 0.00169 (0.00134, 0.00213)    |
| Cystic Fibrosis | Incidence  | 2    | 0.00133 (0.00104, 0.00170)         | 0.00134 (0.00105, 0.00172)    | 0.00123 (0.00095, 0.00160)    | 0.00137 (0.00106, 0.00177)    |
| Cystic Fibrosis | Incidence  | 3    | 0.000374 (0.000232, 0.000596)      | 0.000213 (0.000110, 0.000398) | 0.000325 (0.000192, 0.000541) | 0.000510 (0.000333, 0.000777) |
| Cystic Fibrosis | Incidence  | 4    | 0.000394 (0.000241, 0.000636)      | 0.000236 (0.000122, 0.000441) | 0.000255 (0.000131, 0.000476) | 0.000461 (0.000277, 0.000755) |
| Cystic Fibrosis | Prevalence | 1    | 0.00333 (0.00285, 0.00388)         | 0.00330 (0.00282, 0.00386)    | 0.00346 (0.00297, 0.00405)    | 0.00318 (0.00269, 0.00376)    |
| Cystic Fibrosis | Prevalence | 2    | 0.00530 (0.00469, 0.00599)         | 0.00513 (0.00452, 0.00582)    | 0.00550 (0.00486, 0.00622)    | 0.00559 (0.00493, 0.00634)    |
| Cystic Fibrosis | Prevalence | 3    | 0.0217 (0.0205, 0.0231)            | 0.0223 (0.0210, 0.0237)       | 0.0226 (0.0212, 0.0240)       | 0.0231 (0.0218, 0.0246)       |
| Cystic Fibrosis | Prevalence | 4    | 0.0221 (0.0207, 0.0235)            | 0.0225 (0.0212, 0.0240)       | 0.0229 (0.0214, 0.0244)       | 0.0229 (0.0214, 0.0246)       |

COPD: Chronic obstructive pulmonary disease. IBD: Inflammatory bowel disease. Incidence: cumulative incidence in the indicated year. Prevalence: point prevalence on the first day of the indicated year.

Table S5. Prevalence and incidence estimates, from MarketScan.

| Disease         | Parameter  | Case | Estimate (95% Confidence Interval) |                            |                            |                            |
|-----------------|------------|------|------------------------------------|----------------------------|----------------------------|----------------------------|
|                 |            |      | 2011                               | 2012                       | 2013                       | 2014                       |
| COPD            | Incidence  | 1    | 1.341 (1.338, 1.344)               | 1.131 (1.128, 1.134)       | 1.153 (1.150, 1.156)       | 1.113 (1.110, 1.116)       |
| COPD            | Incidence  | 2    | 1.147 (1.144, 1.150)               | 0.945 (0.942, 0.947)       | 0.957 (0.954, 0.960)       | 0.905 (0.902, 0.907)       |
| COPD            | Incidence  | 3    | 1.078 (1.075, 1.080)               | 0.848 (0.845, 0.850)       | 0.834 (0.831, 0.837)       | 0.771 (0.768, 0.774)       |
| COPD            | Incidence  | 4    | 1.143 (1.140, 1.146)               | 0.892 (0.889, 0.895)       | 0.848 (0.845, 0.851)       | 0.810 (0.807, 0.813)       |
| COPD            | Prevalence | 1    | 1.388 (1.384, 1.391)               | 1.536 (1.532, 1.539)       | 1.512 (1.508, 1.516)       | 1.362 (1.359, 1.366)       |
| COPD            | Prevalence | 2    | 1.927 (1.923, 1.931)               | 2.027 (2.023, 2.030)       | 2.055 (2.051, 2.059)       | 1.899 (1.895, 1.903)       |
| COPD            | Prevalence | 3    | 2.195 (2.191, 2.199)               | 2.543 (2.539, 2.547)       | 2.778 (2.773, 2.783)       | 2.733 (2.728, 2.737)       |
| COPD            | Prevalence | 4    | 2.215 (2.210, 2.219)               | 2.552 (2.548, 2.557)       | 2.841 (2.835, 2.846)       | 2.773 (2.767, 2.778)       |
| Psoriasis       | Incidence  | 1    | 0.397 (0.396, 0.399)               | 0.391 (0.389, 0.392)       | 0.412 (0.410, 0.413)       | 0.444 (0.442, 0.446)       |
| Psoriasis       | Incidence  | 2    | 0.337 (0.336, 0.339)               | 0.324 (0.323, 0.326)       | 0.340 (0.338, 0.342)       | 0.362 (0.360, 0.364)       |
| Psoriasis       | Incidence  | 3    | 0.315 (0.313, 0.316)               | 0.293 (0.291, 0.294)       | 0.300 (0.298, 0.301)       | 0.310 (0.309, 0.312)       |
| Psoriasis       | Incidence  | 4    | 0.343 (0.341, 0.345)               | 0.318 (0.316, 0.319)       | 0.319 (0.317, 0.320)       | 0.339 (0.337, 0.341)       |
| Psoriasis       | Prevalence | 1    | 0.394 (0.392, 0.396)               | 0.472 (0.470, 0.474)       | 0.471 (0.469, 0.473)       | 0.460 (0.458, 0.462)       |
| Psoriasis       | Prevalence | 2    | 0.566 (0.564, 0.568)               | 0.645 (0.642, 0.647)       | 0.671 (0.668, 0.673)       | 0.679 (0.676, 0.681)       |
| Psoriasis       | Prevalence | 3    | 0.653 (0.651, 0.655)               | 0.820 (0.817, 0.822)       | 0.922 (0.919, 0.925)       | 0.993 (0.990, 0.996)       |
| Psoriasis       | Prevalence | 4    | 0.677 (0.674, 0.679)               | 0.849 (0.847, 0.852)       | 0.964 (0.961, 0.968)       | 1.039 (1.035, 1.042)       |
| IBD             | Incidence  | 1    | 0.276 (0.274, 0.277)               | 0.254 (0.252, 0.255)       | 0.268 (0.266, 0.270)       | 0.283 (0.281, 0.284)       |
| IBD             | Incidence  | 2    | 0.224 (0.222, 0.225)               | 0.201 (0.200, 0.202)       | 0.211 (0.210, 0.213)       | 0.214 (0.212, 0.215)       |
| IBD             | Incidence  | 3    | 0.208 (0.207, 0.210)               | 0.181 (0.180, 0.183)       | 0.186 (0.185, 0.188)       | 0.184 (0.182, 0.185)       |
| IBD             | Incidence  | 4    | 0.224 (0.223, 0.225)               | 0.193 (0.192, 0.194)       | 0.194 (0.192, 0.195)       | 0.196 (0.194, 0.197)       |
| IBD             | Prevalence | 1    | 0.342 (0.340, 0.343)               | 0.394 (0.392, 0.396)       | 0.391 (0.389, 0.393)       | 0.379 (0.377, 0.381)       |
| IBD             | Prevalence | 2    | 0.445 (0.443, 0.447)               | 0.496 (0.494, 0.498)       | 0.506 (0.504, 0.508)       | 0.511 (0.509, 0.513)       |
| IBD             | Prevalence | 3    | 0.497 (0.495, 0.499)               | 0.594 (0.592, 0.596)       | 0.647 (0.644, 0.649)       | 0.685 (0.682, 0.687)       |
| IBD             | Prevalence | 4    | 0.509 (0.507, 0.511)               | 0.610 (0.608, 0.613)       | 0.669 (0.667, 0.672)       | 0.710 (0.707, 0.713)       |
| Schizophrenia   | Incidence  | 1    | 0.0490 (0.0484, 0.0496)            | 0.0435 (0.0430, 0.0441)    | 0.0502 (0.0495, 0.0509)    | 0.0503 (0.0496, 0.0509)    |
| Schizophrenia   | Incidence  | 2    | 0.0439 (0.0433, 0.0445)            | 0.0388 (0.0383, 0.0394)    | 0.0449 (0.0442, 0.0455)    | 0.0424 (0.0418, 0.0430)    |
| Schizophrenia   | Incidence  | 3    | 0.0422 (0.0417, 0.0428)            | 0.0366 (0.0361, 0.0371)    | 0.0420 (0.0414, 0.0427)    | 0.0391 (0.0385, 0.0397)    |
| Schizophrenia   | Incidence  | 4    | 0.0437 (0.0431, 0.0443)            | 0.0376 (0.0370, 0.0382)    | 0.0417 (0.0410, 0.0424)    | 0.0400 (0.0394, 0.0407)    |
| Schizophrenia   | Prevalence | 1    | 0.0597 (0.0590, 0.0603)            | 0.0684 (0.0677, 0.0691)    | 0.0697 (0.0689, 0.0705)    | 0.0669 (0.0661, 0.0677)    |
| Schizophrenia   | Prevalence | 2    | 0.0755 (0.0747, 0.0762)            | 0.0838 (0.0830, 0.0846)    | 0.0882 (0.0873, 0.0891)    | 0.0888 (0.0879, 0.0897)    |
| Schizophrenia   | Prevalence | 3    | 0.0840 (0.0832, 0.0848)            | 0.0998 (0.0990, 0.1007)    | 0.112 (0.111, 0.113)       | 0.118 (0.117, 0.119)       |
| Schizophrenia   | Prevalence | 4    | 0.0839 (0.0831, 0.0848)            | 0.0994 (0.0985, 0.1003)    | 0.113 (0.111, 0.114)       | 0.117 (0.115, 0.118)       |
| Cystic Fibrosis | Incidence  | 1    | 0.0114 (0.0112, 0.0117)            | 0.00929 (0.00903, 0.00955) | 0.00941 (0.00912, 0.00971) | 0.00925 (0.00897, 0.00954) |
| Cystic Fibrosis | Incidence  | 2    | 0.0106 (0.0103, 0.0109)            | 0.00877 (0.00852, 0.00903) | 0.00887 (0.00858, 0.00916) | 0.00817 (0.00791, 0.00845) |
| Cystic Fibrosis | Incidence  | 3    | 0.0104 (0.0102, 0.0107)            | 0.00861 (0.00836, 0.00887) | 0.00864 (0.00836, 0.00893) | 0.00791 (0.00765, 0.00818) |
| Cystic Fibrosis | Incidence  | 4    | 0.0110 (0.0107, 0.0114)            | 0.00910 (0.00882, 0.00939) | 0.00905 (0.00874, 0.00938) | 0.00851 (0.00821, 0.00881) |
| Cystic Fibrosis | Prevalence | 1    | 0.0159 (0.0156, 0.0163)            | 0.0175 (0.0171, 0.0178)    | 0.0164 (0.0160, 0.0168)    | 0.0151 (0.0148, 0.0155)    |
| Cystic Fibrosis | Prevalence | 2    | 0.0226 (0.0222, 0.0231)            | 0.0231 (0.0227, 0.0236)    | 0.0224 (0.0219, 0.0228)    | 0.0212 (0.0207, 0.0216)    |
| Cystic Fibrosis | Prevalence | 3    | 0.0280 (0.0276, 0.0285)            | 0.0326 (0.0321, 0.0331)    | 0.0350 (0.0344, 0.0356)    | 0.0363 (0.0358, 0.0369)    |
| Cystic Fibrosis | Prevalence | 4    | 0.0284 (0.0279, 0.0289)            | 0.0332 (0.0327, 0.0338)    | 0.0362 (0.0355, 0.0368)    | 0.0378 (0.0372, 0.0384)    |

COPD: Chronic obstructive pulmonary disease. IBD: Inflammatory bowel disease. Incidence: cumulative incidence in the indicated year. Prevalence: point prevalence on the first day of the indicated year.

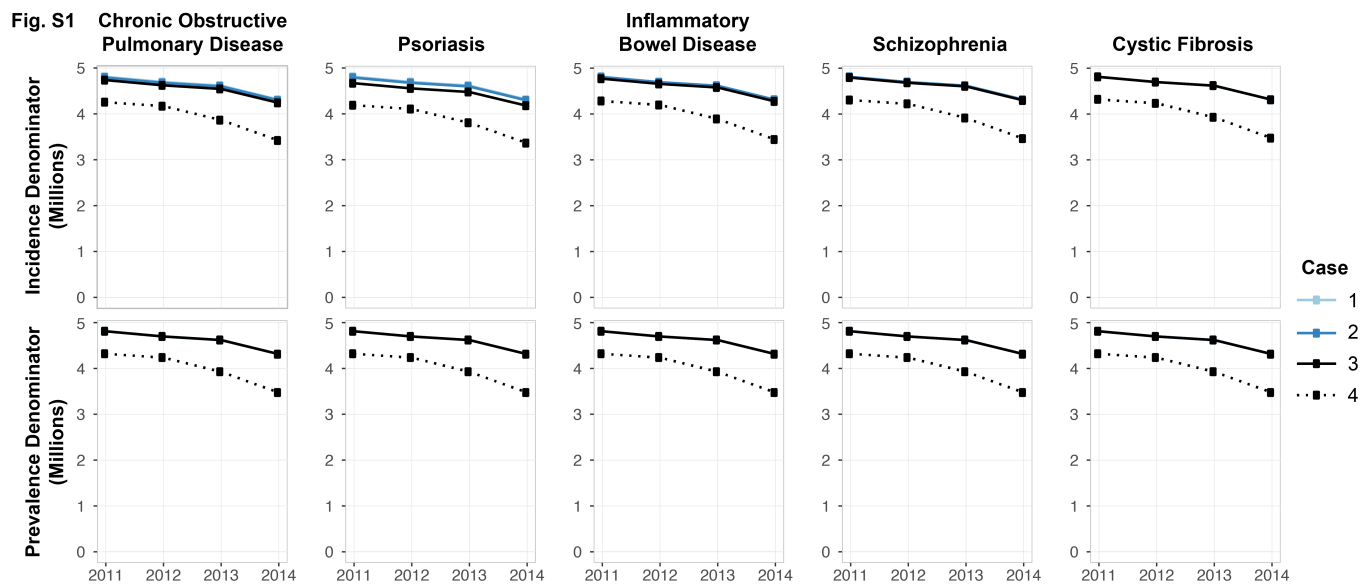

Figure S1. Denominators for incidence and prevalence, in CPRD. Numbers for case 1 and 2 generally overlap with those of case 3, which is why they may not be visible.

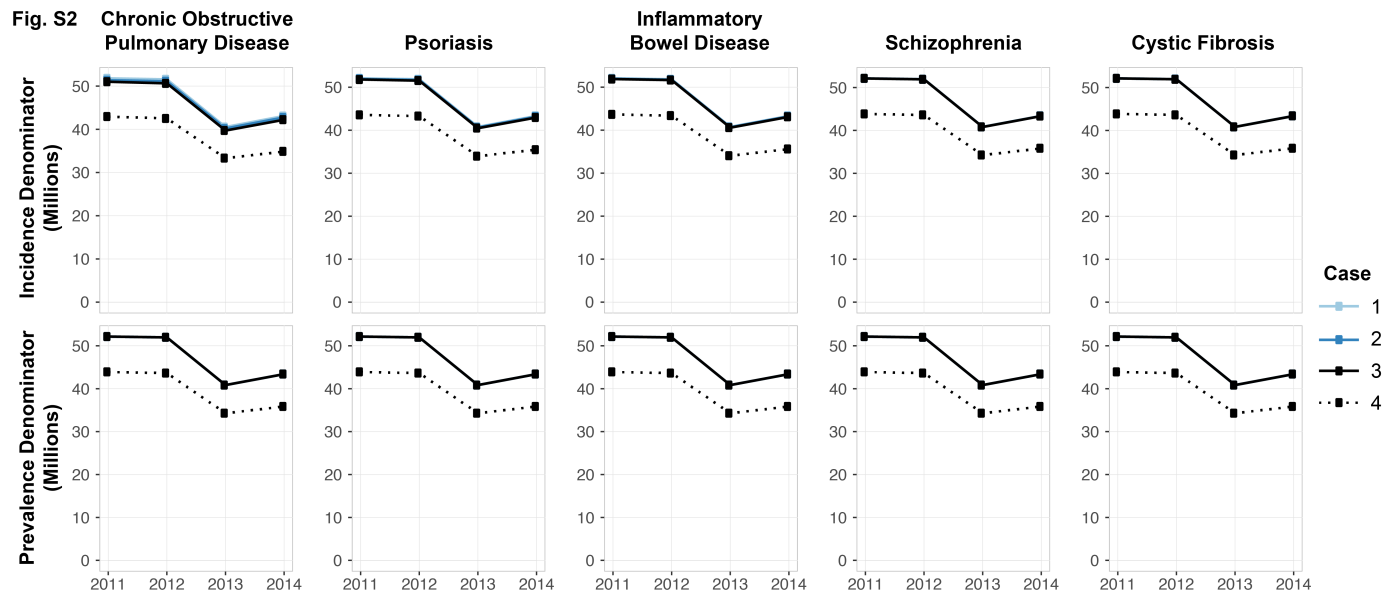

Figure S2. Denominators for incidence and prevalence, in MarketScan. Numbers for case 1 and 2 generally overlap with those of case 3, which is why they may not be visible.
